# Supplementary material
Source: MDPI journal article supplement (https://www.mdpi.com/2673-8112/4/5/45)
Supplement: s1 [file s1]

# Supplementary Materials

## Contents

|            |                                                                |           |
|------------|----------------------------------------------------------------|-----------|
| <b>S1</b>  | <b>Introductory Remarks</b>                                    | <b>1</b>  |
| <b>S2</b>  | <b>Significant Correlations for Media Sources</b>              | <b>2</b>  |
| <b>S3</b>  | <b>Exploratory Factor Analysis for Information Sources</b>     | <b>4</b>  |
| <b>S4</b>  | <b>Survey Demographics</b>                                     | <b>5</b>  |
| <b>S5</b>  | <b>Model Comparison Test</b>                                   | <b>6</b>  |
| <b>S6</b>  | <b>Model A: Conservative Media</b>                             | <b>7</b>  |
| <b>S7</b>  | <b>Confirmatory Factor Analysis for Best Fitting Model (A)</b> | <b>10</b> |
| <b>S8</b>  | <b>Model B: Mainstream Media</b>                               | <b>12</b> |
| <b>S9</b>  | <b>Model C: Mainstream and Liberal Media</b>                   | <b>15</b> |
| <b>S10</b> | <b>Model D: Mainstream and Conservative Media</b>              | <b>18</b> |
| <b>S11</b> | <b>Model E: All Media</b>                                      | <b>21</b> |

## S1 Introductory Remarks

For this analysis we use the *lavaan* package (Rosseel 2012) to fit structural equation models using the maximum likelihood estimator with NLMINB optimization. The structure of each model is given in the diagrams in the paper, with the information source varying between the models. The best fit model corresponds to the choice of Conservative media (Model A) as the information source, with the second best fit model corresponding to the choice of Mainstream media (Model B) as the information source. Exploratory factor analysis indicated that Mainstream media and Liberal media were measuring the same media consumption habits, so the Liberal media was not considered separately. The combined Mainstream and Liberal media (Model C) is the worst fit. Similarly, for Conservative media, the factor analysis indicated that only one question should be used, so for that model, there is no hidden latent variable for information source. Rather, it is measured by a single survey item. We appreciate the suggestion from one reviewer to consider other choices for the information source. Model D considers Conservative and Mainstream media together, while Model E includes all information sources. As indicated in the Section S5 of the supplement, Model E is the worst fit of all 5 models, while Model D and Model C are not significantly distinguishable in terms of fit statistics.

## S2 Significant Correlations for Media Sources

### Survey Question on Media

Question 27: How much information do you get from the following sources? (LIKERT)

27-1 Mainstream Media (Associated Press, New York Times, Wall Street Journal, USA Today, or Washington Post)

27-2 Conservative Media (Fox News, Rush Limbaugh, Breitbart News, One America News, or The Drudge Report)

27-3 Mainstream Broadcast Media (ABC News, CBS News, NBC News, Univision)

27-4 Liberal Media (MSNBC, Vox, Vice, or Huffington Post)

27-5 Online News Aggregators (Google News or Yahoo News)

27-6 Social Media (Facebook, Twitter, WhatsApp, or YouTube)

27-7 The radio

### Significant ( $p < 0.05$ ) Spearman Correlation Coefficients with Media Source Question (Q27)

| Identity                           | 27-1                                    | 27-2                                     | 27-3                                      | 27-4                                   | 27-5                                     | 27-6                                     | 27-7                    |
|------------------------------------|-----------------------------------------|------------------------------------------|-------------------------------------------|----------------------------------------|------------------------------------------|------------------------------------------|-------------------------|
| Conservative<br>( <i>p-value</i> ) | -0.4275478<br>( $2.2 \times 10^{-16}$ ) | 0.4859965<br>( $2.2 \times 10^{-16}$ )   | -0.2547644<br>( $7.263 \times 10^{-16}$ ) | -0.361862<br>( $2.2 \times 10^{-16}$ ) | -0.1415368<br>( $9.823 \times 10^{-6}$ ) |                                          |                         |
| Liberal<br>( <i>p-value</i> )      | 0.3821175<br>( $2.2 \times 10^{-16}$ )  | -0.3930313<br>( $2.2 \times 10^{-16}$ )  | 0.07114212<br>(0.02656)                   | 0.3506838<br>( $2.2 \times 10^{-16}$ ) |                                          |                                          | 0.1027962<br>(0.001378) |
| Libertarian<br>( <i>p-value</i> )  | -0.09788481<br>(0.002261)               | 0.0788199<br>(0.01402)                   | -0.09334834<br>(0.003581)                 | -0.07483099<br>(0.02008)               |                                          |                                          |                         |
| Nonpolitical<br>( <i>p-value</i> ) | -0.0701136<br>(0.02891)                 |                                          |                                           |                                        |                                          | 0.1218221<br>(0.0001473)                 |                         |
| Other<br>( <i>p-value</i> )        |                                         |                                          | -0.06547945<br>(0.04125)                  |                                        |                                          |                                          |                         |
| Over 65<br>( <i>p-value</i> )      |                                         |                                          | 0.1551145<br>( $1.557 \times 10^{-6}$ )   |                                        |                                          | -0.1780949<br>( $3.614 \times 10^{-8}$ ) |                         |
| Female<br>( <i>p-value</i> )       | 0.1075755<br>(0.0007573)                | -0.1267613<br>( $7.154 \times 10^{-5}$ ) | 0.1373828<br>( $1.639 \times 10^{-5}$ )   | 0.1077401<br>(0.0007766)               |                                          | 0.08012539<br>(0.0125)                   |                         |
| Rural                              |                                         |                                          |                                           | -0.07069575<br>(0.02635)               | -0.08410547<br>(0.008105)                |                                          | 0.08068725<br>(0.01114) |

**Significant ( $p < 0.5$ ) Spearman Correlation Coefficients between Demographics and Ideology**

|                                    | Over 65                                  | Female                    | Rural                    |
|------------------------------------|------------------------------------------|---------------------------|--------------------------|
| Conservative<br>( <i>p-value</i> ) | 0.06711169<br>(0.03904)                  | -0.1223746<br>(0.0001309) | 0.07420102<br>(0.2024)   |
| Liberal<br>( <i>p-value</i> )      |                                          | 0.07841319<br>(0.01447)   |                          |
| Libertarian<br>( <i>p-value</i> )  | -0.06587415<br>(0.0428)                  | -0.1032616<br>(0.001265)  |                          |
| Nonpolitical<br>( <i>p-value</i> ) | -0.1316539<br>( $4.873 \times 10^{-5}$ ) | 0.06699259<br>(0.03677)   | -0.07170131<br>(0.02487) |
| Other<br>( <i>p-value</i> )        | -0.07961791<br>(0.01431)                 |                           |                          |

### S3 Exploratory Factor Analysis for Information Sources

We used a maximum likelihood estimator with the Geomin Oblique rotation method in *lavaan* to evaluate the decomposition of the responses to the media sources question (Q27) with 1, 2, and 3 factors. As seen from the fit statistics in the table below, 2 factors gives a significant reduction in the RSEA over 1 factor while still having a significant p-value for the chi-squared statistic. This combined with the correlations in the tables above justifies our choice of decomposition for our media sources question.

**EFA Fit Statistics**

| Statistic                             | 1-factor | 2-factor | 3-factor |
|---------------------------------------|----------|----------|----------|
| Number of model parameters            | 14       | 20       | 25       |
| chi-squared                           | 181.658  | 25.536   | 6.604    |
| Degrees of freedom                    | 14       | 8        | 3        |
| P-value (Chi-square)                  | 0.000    | 0.001    | 0.109    |
| Comparative Fit Index (CFI)           | 0.796    | 0.979    | 0.996    |
| Tucker-Lewis Index (TLI)              | 0.695    | 0.944    | 0.974    |
| Akaike (AIC)                          | 19178.15 | 19034.03 | 19024.56 |
| Bayesian (BIC)                        | 19246.42 | 19131.56 | 19146.47 |
| Sample-size adjusted Bayesian (SABIC) | 19201.96 | 19068.04 | 19067.07 |
| RMSEA                                 | 0.111    | 0.048    | 0.032    |

**Standardized Loadings for 2 Factor EFA Model**

| Questions | Factor 1 | Factor 2 | Unique Var | Communalities |
|-----------|----------|----------|------------|---------------|
| 27-1      | 0.766    |          | 0.427      | 0.573         |
| 27-2      | -0.301   | 0.318    | 0.852      | 0.148         |
| 27-3      | 0.559    |          | 0.683      | 0.317         |
| 27-4      | 0.595    |          | 0.574      | 0.426         |
| 27-5      | 0.273    | 0.447    | 0.670      | 0.330         |
| 27-6      |          | 0.653    | 0.577      | 0.423         |
| 27-7      |          |          | 0.964      | 0.036         |

**Variance for 2 Factor EFA Model**

| Statistic                  | 1-factor | 2-factor | Total |
|----------------------------|----------|----------|-------|
| Sum of sq (obliq) loadings | 1.452    | 0.802    | 2.254 |
| Proportion of Total        | 0.644    | 0.356    | 1.000 |
| Proportion of Var          | 0.207    | 0.115    | 0.322 |
| Cumulative Var             | 0.207    | 0.322    | 0.322 |

## S4 Survey Demographics

| Attribute              | Response                            | Idaho (%) | Texas (%) | Vermont (%) | Total (%) |
|------------------------|-------------------------------------|-----------|-----------|-------------|-----------|
| Age                    | Under 25                            | 3.0       | 4.4       | 3.4         | 3.3       |
|                        | 25–34                               | 10.9      | 12.6      | 11.7        | 11.4      |
|                        | 35–44                               | 15.1      | 17.0      | 11.1        | 13.9      |
|                        | 45–54                               | 15.1      | 16.3      | 13.4        | 14.6      |
|                        | 55–64                               | 20.6      | 19.3      | 25.1        | 22.1      |
|                        | 65–74                               | 25.7      | 17.8      | 26.8        | 25.0      |
|                        | 75+                                 | 9.6       | 12.6      | 8.5         | 9.6       |
| Gender                 | Male                                | 42.0      | 48.5      | 45.7        | 44.2      |
|                        | Female                              | 57.4      | 50.7      | 53.8        | 55.2      |
|                        | Not Male or Female ID               | 0.6       | 0.7       | 0.6         | 0.6       |
| Educational Attainment | No HS diploma                       | 0.4       | 0.7       | 0.3         | 0.4       |
|                        | HS diploma or equivalent            | 7.5       | 13.9      | 7.5         | 8.4       |
|                        | Some college                        | 19.6      | 12.4      | 11.7        | 15.7      |
|                        | Associate’s degree                  | 11.7      | 9.5       | 5.3         | 9.1       |
|                        | Bachelor’s degree or higher         | 60.9      | 63.5      | 75.1        | 66.4      |
| Political Ideology     | Moderate                            | 28.8      | 35.6      | 28.5        | 29.6      |
|                        | Liberal                             | 19.0      | 15.6      | 46.6        | 28.5      |
|                        | Conservative                        | 37.3      | 34.1      | 13.3        | 28.2      |
|                        | Libertarian                         | 4.1       | 4.4       | 2.5         | 3.6       |
|                        | Nonpolitical                        | 8.6       | 7.4       | 7.1         | 7.9       |
|                        | Other                               | 2.2       | 3.0       | 2.0         | 2.2       |
| Race                   | No Answer                           | 8.0       | 9.0       | 3.8         | 6.7       |
|                        | American Indian or Alaska Native    | 0.2       | 0.7       | 0.0         | 0.2       |
|                        | Multi-race                          | 3.8       | 3.5       | 0.8         | 2.7       |
|                        | Asian or Asian-American             | 1.1       | 4.2       | 1.1         | 1.5       |
|                        | Black or African-American           | 0.2       | 6.9       | 0.8         | 1.4       |
|                        | Native Hawaiian or Pacific Islander | 0.4       | 0.0       | 0.0         | 0.2       |
|                        | White                               | 83.5      | 72.9      | 91.8        | 84.9      |
|                        | Other                               | 2.9       | 2.8       | 1.6         | 2.4       |
| Ethnicity              | Hispanic                            | 4.3       | 11.1      | 0.6         | 3.9       |
|                        | Non-Hispanic                        | 95.7      | 88.9      | 99.4        | 96.1      |
| Rurality*              | Rural                               | 36.3      | 27.8      | 55.6        | 41.9      |
|                        | Urban                               | 63.7      | 72.2      | 44.4        | 58.1      |
| Total                  | (count of responses)                | 526       | 143       | 365         | 1034      |

\* Rurality determined by address of respondent, not self-identified

## S5 Model Comparison Test

We compared the models against one another based on the lavaan test statistic (chi squared) using an anova test built into the lavaan package (lavtestLRT). Below we report the chi-squared difference and the p-value for each pairwise comparison. Model A is the best fit, followed by model B, with model C having the worst fit of our three primary models. For completeness, we also compare against models D (Mainstream and Conservative Media) and E (All information sources). Model E is the worst fit of all five models, while Model D is statistically indistinguishable from Model C..

| A vs B  | chi-squared | difference | p-value                |
|---------|-------------|------------|------------------------|
| Model A | 377.98      |            |                        |
| Model B | 475.18      | 97.19      | $7.223 \times 10^{-3}$ |

| A vs C  | chi-squared | difference | p-value                 |
|---------|-------------|------------|-------------------------|
| Model A | 377.98      |            |                         |
| Model C | 548.13      | 170.15     | $< 2.2 \times 10^{-16}$ |

| B vs C  | chi-squared | difference | p-value                |
|---------|-------------|------------|------------------------|
| Model B | 475.18      |            |                        |
| Model C | 548.13      | 72.959     | $5.944 \times 10^{-8}$ |

| A vs D  | chi-squared | difference | p-value                 |
|---------|-------------|------------|-------------------------|
| Model A | 377.98      |            |                         |
| Model D | 597.69      | 219.7      | $< 2.2 \times 10^{-16}$ |

| A vs E  | chi-squared | difference | p-value                 |
|---------|-------------|------------|-------------------------|
| Model A | 377.98      |            |                         |
| Model E | 1210.78     | 613.09     | $< 2.2 \times 10^{-16}$ |

| B vs D  | chi-squared | difference | p-value                 |
|---------|-------------|------------|-------------------------|
| Model B | 475.18      |            |                         |
| Model D | 597.69      | 122.51     | $< 2.2 \times 10^{-16}$ |

| B vs E  | chi-squared | difference | p-value                 |
|---------|-------------|------------|-------------------------|
| Model B | 475.18      |            |                         |
| Model E | 1210.78     | 735.6      | $< 2.2 \times 10^{-16}$ |

| C vs D  | chi-squared | difference | p-value |
|---------|-------------|------------|---------|
| Model C | 548.13      |            |         |
| Model D | 597.69      | 49.553     | 1       |

| C vs E  | chi-squared | difference | p-value                 |
|---------|-------------|------------|-------------------------|
| Model C | 548.13      |            |                         |
| Model E | 1210.78     | 662.64     | $< 2.2 \times 10^{-16}$ |

| D vs E  | chi-squared | difference | p-value                 |
|---------|-------------|------------|-------------------------|
| Model D | 597.69      |            |                         |
| Model E | 1210.78     | 613.09     | $< 2.2 \times 10^{-16}$ |

## S6 Model A: Conservative Media

### Model Fit Statistics: (A) Conservative Media

|                                       |                   |
|---------------------------------------|-------------------|
| Number of model parameters            | 72                |
| Number of observations                | 912 (out of 1034) |
| chi-squared                           | 377.985           |
| Degrees of freedom                    | 93                |
| P-value (Chi-square)                  | 0.000             |
| Akaike (AIC)                          | 12590.637         |
| Bayesian (BIC)                        | 12937.363         |
| Sample-size adjusted Bayesian (SABIC) | 12708.701         |

### Latent Variable Construction: (A) Conservative Media

| Latent Variables  | Survey Items | Estimate | Std.Err | z-value | $P(>  z )$ | Std.lv | Std.all |
|-------------------|--------------|----------|---------|---------|------------|--------|---------|
| Knowledge         | Q24-1        | 1.000    |         |         |            | 0.815  | 0.815   |
|                   | Q24-2        | 0.903    | 0.048   | 18.636  | 0.000      | 0.736  | 0.736   |
|                   | Q24-3        | 0.709    | 0.046   | 15.563  | 0.000      | 0.578  | 0.578   |
|                   | Q24-4        | 0.712    | 0.046   | 15.610  | 0.000      | 0.580  | 0.580   |
| Peer Influence    | Q14          | 1.000    |         |         |            | 0.733  | 0.733   |
|                   | Q15          | 0.957    | 0.125   | 7.676   | 0.000      | 0.701  | 0.702   |
| COVID Concern     | Q12          | 1.000    |         |         |            | 0.666  | 0.666   |
|                   | Q13          | 0.824    | 0.057   | 14.473  | 0.000      | 0.549  | 0.549   |
| Vaccine Intention | Q22          | 1.000    |         |         |            | 0.817  | 0.818   |
|                   | Q23          | 1.113    | 0.053   | 21.093  | 0.000      | 0.909  | 0.910   |

### Path effects of key variables on Vaccine Intention (A-Conservative Media)

|                           | Estimate | Std.Err | z-value | $P(>  z )$ | Std.lv | Std.all |
|---------------------------|----------|---------|---------|------------|--------|---------|
| Identiy as Conservative   | -0.547   | 0.073   | -7.511  | 0.000      | -0.669 | -0.299  |
| Over 65                   | 0.279    | 0.058   | 4.852   | 0.000      | 0.342  | 0.162   |
| Female ID                 | -0.224   | 0.055   | -4.086  | 0.000      | -0.274 | -0.136  |
| Info Source: Conservative | -0.053   | 0.032   | -1.646  | 0.100      | -0.064 | -0.064  |

### Regressions Statistics for (A) Conservative Media Info Sources Model

| Dependent Variable        | Feature                    | Estimate | Std.Err | z-value | $P(>  z )$ | Std.lv | Std.all |
|---------------------------|----------------------------|----------|---------|---------|------------|--------|---------|
| Peer Influence            | Rural                      | -0.170   | 0.059   | -2.905  | 0.004      | -0.232 | -0.115  |
|                           | Over 65                    | 0.012    | 0.061   | 0.202   | 0.840      | 0.017  | 0.008   |
|                           | Female ID                  | 0.051    | 0.058   | 0.878   | 0.380      | 0.069  | 0.034   |
|                           | White                      | 0.031    | 0.097   | 0.316   | 0.752      | 0.042  | 0.012   |
|                           | Liberal ID                 | -0.330   | 0.076   | -4.341  | 0.000      | -0.450 | -0.205  |
|                           | Conservative ID            | -0.510   | 0.081   | -6.299  | 0.000      | -0.696 | -0.312  |
|                           | Libertarian ID             | -0.291   | 0.160   | -1.821  | 0.069      | -0.397 | -0.074  |
|                           | Non-Political ID           | 0.187    | 0.119   | 1.581   | 0.114      | 0.256  | 0.067   |
|                           | Other Political ID         | -0.051   | 0.199   | -0.258  | 0.796      | -0.070 | -0.010  |
| Info Source: Conservative | Peer Inf                   | -0.042   | 0.049   | -0.855  | 0.392      | -0.031 | -0.031  |
|                           | Rural                      | -0.081   | 0.057   | -1.426  | 0.154      | -0.081 | -0.040  |
|                           | Over 65                    | 0.103    | 0.059   | 1.745   | 0.081      | 0.103  | 0.049   |
|                           | Female ID                  | -0.072   | 0.056   | -1.276  | 0.202      | -0.072 | -0.036  |
|                           | White                      | 0.004    | 0.094   | 0.041   | 0.967      | 0.004  | 0.001   |
|                           | Liberal ID                 | -0.357   | 0.073   | -4.887  | 0.000      | -0.357 | -0.163  |
|                           | Conservative ID            | 1.032    | 0.077   | 13.375  | 0.000      | 1.032  | 0.462   |
|                           | Libertarian ID             | 0.580    | 0.155   | 3.748   | 0.000      | 0.580  | 0.108   |
|                           | Non-Political ID           | 0.238    | 0.115   | 2.072   | 0.038      | 0.238  | 0.062   |
|                           | Other Political ID         | 0.079    | 0.193   | 0.408   | 0.683      | 0.079  | 0.012   |
| Knowledge                 | Info: Conservative (Q27-2) | -0.008   | 0.036   | -0.223  | 0.823      | -0.010 | -0.010  |
|                           | Rural                      | -0.072   | 0.061   | -1.189  | 0.235      | -0.089 | -0.044  |
|                           | Over 65                    | 0.154    | 0.064   | 2.405   | 0.016      | 0.189  | 0.090   |
|                           | Female ID                  | -0.152   | 0.061   | -2.496  | 0.013      | -0.187 | -0.093  |
|                           | White                      | -0.024   | 0.102   | -0.230  | 0.818      | -0.029 | -0.009  |
|                           | Liberal ID                 | -0.009   | 0.078   | -0.118  | 0.906      | -0.011 | -0.005  |
|                           | Conservative ID            | 0.172    | 0.088   | 1.964   | 0.050      | 0.212  | 0.095   |
|                           | Libertarian ID             | 0.155    | 0.169   | 0.921   | 0.357      | 0.191  | 0.036   |
|                           | Non-Political ID           | 0.165    | 0.125   | 1.324   | 0.186      | 0.203  | 0.053   |
|                           | Other Political ID         | 0.271    | 0.209   | 1.293   | 0.196      | 0.332  | 0.049   |
| COVID Concern             | Info: Conservative (Q27-2) | -0.141   | 0.029   | -4.855  | 0.000      | -0.212 | -0.212  |
|                           | Rural                      | -0.120   | 0.049   | -2.436  | 0.015      | -0.180 | -0.089  |
|                           | Over 65                    | 0.317    | 0.052   | 6.101   | 0.000      | 0.477  | 0.227   |
|                           | Female ID                  | 0.086    | 0.049   | 1.756   | 0.079      | 0.129  | 0.064   |
|                           | White                      | 0.087    | 0.082   | 1.058   | 0.290      | 0.131  | 0.039   |
|                           | Liberal ID                 | 0.336    | 0.063   | 5.290   | 0.000      | 0.505  | 0.230   |
|                           | Conservative ID            | -0.604   | 0.072   | -8.378  | 0.000      | -0.908 | -0.406  |
|                           | Libertarian ID             | -1.001   | 0.138   | -7.261  | 0.000      | -1.504 | -0.281  |
|                           | Non-Political ID           | -0.455   | 0.101   | -4.506  | 0.000      | -0.683 | -0.178  |
|                           | Other Political ID         | 0.134    | 0.169   | 0.795   | 0.426      | 0.201  | 0.029   |



### Regressions Statistics for (A) Conservative Media Info Sources Model

| Dependent Variable | Feature                    | Estimate | Std.Err | z-value | $P(>  z )$ | Std.lv | Std.all |
|--------------------|----------------------------|----------|---------|---------|------------|--------|---------|
| Vaccine Intention  | Info: Conservative (Q27-2) | 0.147    | 0.054   | 2.717   | 0.007      | 0.180  | 0.180   |
|                    | Knowledge                  | 0.033    | 0.034   | 0.978   | 0.328      | 0.033  | 0.033   |
|                    | COVID Concern              | 1.411    | 0.258   | 5.467   | 0.000      | 1.149  | 1.149   |
|                    | Rural                      | 0.055    | 0.075   | 0.727   | 0.467      | 0.067  | 0.033   |
|                    | Over 65                    | -0.168   | 0.108   | -1.561  | 0.118      | -0.206 | -0.098  |
|                    | Female ID                  | -0.340   | 0.073   | -4.633  | 0.000      | -0.416 | -0.207  |
|                    | White                      | 0.099    | 0.118   | 0.835   | 0.404      | 0.121  | 0.036   |
|                    | Liberal ID                 | -0.316   | 0.123   | -2.580  | 0.010      | -0.387 | -0.177  |
|                    | Conservative ID            | 0.355    | 0.181   | 1.963   | 0.050      | 0.435  | 0.195   |
|                    | Libertarian ID             | 0.624    | 0.315   | 1.980   | 0.048      | 0.764  | 0.143   |
|                    | Non-Political ID           | 0.417    | 0.182   | 2.290   | 0.022      | 0.510  | 0.133   |
|                    | Other Political ID         | -0.463   | 0.241   | -1.923  | 0.054      | -0.566 | -0.083  |

## S7 Confirmatory Factor Analysis for Best Fitting Model (A)

### CFA Fit Statistics: (A) Conservative Media

|                                       |                   |
|---------------------------------------|-------------------|
| Number of model parameters            | 31                |
| Number of observations                | 964 (out of 1034) |
| chi squared (user)                    | 246.917           |
| Degrees of freedom (user)             | 35                |
| P-value (Chi-square)(user)            | 0.000             |
| chi squared (baseline)                | 3021.542          |
| Degrees of freedom (baseline)         | 55                |
| P-value (Chi-square)(baseline)        | 0.000             |
| Comparative Fit Index (CFI)           | 0.929             |
| Tucker-Lewis Index (TLI)              | 0.888             |
| Loglikelihood user model (H0)         | -13653.609        |
| Loglikelihood unrestricted model (H1) | -13530.150        |
| Akaike (AIC)                          | 27369.217         |
| Bayesian (BIC)                        | 27520.221         |
| Sample-size adjusted Bayesian (SABIC) | 27421.765         |
| RMSEA                                 | 0.079             |
| RMSEA 90% CI - upper                  | 0.089             |
| RMSEA 90% CI - lower                  | 0.070             |

### CFA Latent Variables: (A) Conservative Media

| Latent Variables   | Survey Items | Estimate | Std.Err | z-value | $P(>  z )$ |
|--------------------|--------------|----------|---------|---------|------------|
| Knowledge          | Q24-1        | 1.000    |         |         |            |
|                    | Q24-2        | 0.896    | 0.048   | 18.539  | 0.000      |
|                    | Q24-3        | 0.734    | 0.046   | 16.033  | 0.000      |
|                    | Q24-4        | 0.739    | 0.046   | 16.121  | 0.000      |
| Peer Influence     | Q14          | 1.000    |         |         |            |
|                    | Q15          | 1.740    | 0.381   | 4.566   | 0.000      |
| COVID Concern      | Q12          | 1.000    |         |         |            |
|                    | Q13          | 0.744    | 0.057   | 13.065  | 0.000      |
| Info: Conservative | Q27-2        | 1.000    |         |         |            |
| Vaccine Intention  | Q22          | 1.000    |         |         |            |
|                    | Q23          | 1.155    | 0.054   | 21.193  | 0.000      |

**CFA Covariances: (A) Conservative Media**

| Latent Variables   | Survey Items       | Estimate | Std.Err | $z$ -value | $P(>  z )$ |
|--------------------|--------------------|----------|---------|------------|------------|
| Knowledge          | Peer Influence     | 0.043    | 0.019   | 2.278      | 0.023      |
|                    | COVID Concern      | -0.052   | 0.027   | -1.917     | 0.055      |
|                    | Info: Conservative | 0.033    | 0.029   | 1.125      | 0.260      |
|                    | Vaccine Intention  | 0.005    | 0.025   | 0.222      | 0.824      |
| Peer Influence     | COVID Concern      | 0.086    | 0.025   | 3.427      | 0.001      |
|                    | Info: Conservative | -0.087   | 0.026   | -3.330     | 0.001      |
|                    | Vaccine Intention  | 0.071    | 0.022   | 3.246      | 0.001      |
| COVID Concern      | Info: Conservative | -0.362   | 0.033   | -10.961    | 0.000      |
|                    | Vaccine Intention  | 0.421    | 0.034   | 12.397     | 0.000      |
| Info: Conservative | Vaccine Intention  | -0.198   | 0.029   | -6.792     | 0.000      |

## S8 Model B: Mainstream Media

### Model Fit Statistics: (B) Mainstream Media

|                                       |                   |
|---------------------------------------|-------------------|
| Number of model parameters            | 75                |
| Number of observations                | 910 (out of 1034) |
| chi squared                           | 475.175           |
| Degrees of freedom                    | 111               |
| P-value (Chi-square)                  | 0.000             |
| Akaike (AIC)                          | 14973.556         |
| Bayesian (BIC)                        | 15334.565         |
| Sample-size adjusted Bayesian (SABIC) | 15096.375         |

### Latent Variable Construction: (B) Mainstream Media

| Latent Variables        | Survey Items | Estimate | Std.Err | z-value | $P(>  z )$ | Std.lv | Std.all |
|-------------------------|--------------|----------|---------|---------|------------|--------|---------|
| Knowledge               | Q24-1        | 1.000    |         |         |            | 0.813  | 0.813   |
|                         | Q24-2        | 0.898    | 0.049   | 18.472  | 0.000      | 0.730  | 0.730   |
|                         | Q24-3        | 0.715    | 0.046   | 15.584  | 0.000      | 0.581  | 0.582   |
|                         | Q24-4        | 0.717    | 0.046   | 15.618  | 0.000      | 0.583  | 0.583   |
| Peer Influence          | Q14          | 1.000    |         |         |            | 0.745  | 0.746   |
|                         | Q15          | 0.928    | 0.121   | 7.656   | 0.000      | 0.691  | 0.692   |
| COVID Concern           | Q12          | 1.000    |         |         |            | 0.661  | 0.662   |
|                         | Q13          | 0.845    | 0.058   | 14.678  | 0.000      | 0.559  | 0.559   |
| Info Source: Mainstream | Q27-1        | 1.000    |         |         |            | 0.775  | 0.775   |
|                         | Q27-3        | 0.686    | 0.056   | 12.150  | 0.000      | 0.531  | 0.532   |
| Vaccine Intention       | Q22          | 1.000    |         |         |            | 0.816  | 0.817   |
|                         | Q23          | 1.114    | 0.051   | 21.835  | 0.000      | 0.909  | 0.910   |

### Path effects of key variables on Vaccine Intention (B-Mainstream Media)

|                          | Estimate | Std.Err | z-value | $P(>  z )$ | Std.lv | Std.all |
|--------------------------|----------|---------|---------|------------|--------|---------|
| Identify as Conservative | -0.541   | 0.073   | -7.438  | 0.000      | -0.662 | -0.296  |
| Over 65                  | 0.284    | 0.058   | 4.925   | 0.000      | 0.348  | 0.165   |
| Female ID                | -0.224   | 0.057   | -3.941  | 0.000      | -0.275 | -0.136  |
| Info Source: Mainstream  | 0.496    | 0.078   | 6.346   | 0.000      | 0.471  | 0.471   |

### Regressions Statistics for (B) Mainstream Media Info Sources Model

| Dependent Variable      | Feature            | Estimate | Std.Err | z-value | $P(>  z )$ | Std.lv | Std.all |
|-------------------------|--------------------|----------|---------|---------|------------|--------|---------|
| Peer Influence          | Rural              | -0.181   | 0.059   | -3.045  | 0.002      | -0.243 | -0.120  |
|                         | Over 65            | 0.008    | 0.062   | 0.134   | 0.893      | 0.011  | 0.005   |
|                         | Female ID          | 0.051    | 0.059   | 0.871   | 0.384      | 0.069  | 0.034   |
|                         | White              | 0.036    | 0.099   | 0.362   | 0.717      | 0.048  | 0.014   |
|                         | Liberal ID         | -0.343   | 0.077   | -4.463  | 0.000      | -0.460 | -0.210  |
|                         | Conservative ID    | -0.510   | 0.081   | -6.265  | 0.000      | -0.684 | -0.306  |
|                         | Libertarian ID     | -0.297   | 0.162   | -1.837  | 0.066      | -0.399 | -0.075  |
|                         | Non-Political ID   | 0.191    | 0.120   | 1.587   | 0.113      | 0.256  | 0.067   |
|                         | Other Political ID | -0.061   | 0.202   | -0.305  | 0.761      | -0.082 | -0.012  |
|                         |                    |          |         |         |            |        |         |
| Info Source: Mainstream | Peer Inf           | 0.034    | 0.046   | 0.739   | 0.460      | 0.033  | 0.033   |
|                         | Rural              | -0.071   | 0.056   | -1.258  | 0.208      | -0.092 | -0.045  |
|                         | Over 65            | 0.171    | 0.059   | 2.925   | 0.003      | 0.221  | 0.105   |
|                         | Female ID          | 0.138    | 0.056   | 2.473   | 0.013      | 0.178  | 0.089   |
|                         | White              | 0.049    | 0.094   | 0.525   | 0.600      | 0.064  | 0.019   |
|                         | Liberal ID         | 0.203    | 0.073   | 2.793   | 0.005      | 0.262  | 0.120   |
|                         | Conservative ID    | -0.915   | 0.078   | -11.749 | 0.000      | -1.181 | -0.528  |
|                         | Libertarian ID     | -0.774   | 0.154   | -5.014  | 0.000      | -0.999 | -0.187  |
|                         | Non-Political ID   | -0.467   | 0.114   | -4.077  | 0.000      | -0.602 | -0.157  |
|                         | Other Political ID | -0.420   | 0.192   | -2.191  | 0.028      | -0.542 | -0.080  |
|                         |                    |          |         |         |            |        |         |
| Knowledge               | Info: Mainstream   | -0.090   | 0.067   | -1.344  | 0.179      | -0.085 | -0.085  |
|                         | Rural              | -0.079   | 0.061   | -1.299  | 0.194      | -0.097 | -0.048  |
|                         | Over 65            | 0.178    | 0.065   | 2.745   | 0.006      | 0.219  | 0.104   |
|                         | Female ID          | -0.141   | 0.062   | -2.286  | 0.022      | -0.173 | -0.086  |
|                         | White              | -0.027   | 0.103   | -0.267  | 0.789      | -0.034 | -0.010  |
|                         | Liberal ID         | 0.011    | 0.078   | 0.146   | 0.884      | 0.014  | 0.006   |
|                         | Conservative ID    | 0.082    | 0.101   | 0.814   | 0.416      | 0.101  | 0.045   |
|                         | Libertarian ID     | 0.076    | 0.175   | 0.434   | 0.664      | 0.093  | 0.017   |
|                         | Non-Political ID   | 0.121    | 0.128   | 0.948   | 0.343      | 0.149  | 0.039   |
|                         | Other Political ID | 0.233    | 0.211   | 1.106   | 0.269      | 0.287  | 0.042   |
|                         |                    |          |         |         |            |        |         |
| COVID Concern           | Info: Mainstream   | 0.425    | 0.069   | 6.175   | 0.000      | 0.498  | 0.498   |
|                         | Rural              | -0.074   | 0.049   | -1.497  | 0.134      | -0.111 | -0.055  |
|                         | Over 65            | 0.224    | 0.053   | 4.246   | 0.000      | 0.339  | 0.161   |
|                         | Female ID          | 0.038    | 0.050   | 0.773   | 0.439      | 0.058  | 0.029   |
|                         | White              | 0.071    | 0.083   | 0.859   | 0.390      | 0.107  | 0.032   |
|                         | Liberal ID         | 0.304    | 0.064   | 4.778   | 0.000      | 0.460  | 0.210   |
|                         | Conservative ID    | -0.351   | 0.089   | -3.950  | 0.000      | -0.531 | -0.237  |
|                         | Libertarian ID     | -0.737   | 0.145   | -5.078  | 0.000      | -1.113 | -0.208  |
|                         | Non-Political ID   | -0.289   | 0.105   | -2.762  | 0.006      | -0.436 | -0.114  |
|                         | Other Political ID | 0.303    | 0.170   | 1.775   | 0.076      | 0.457  | 0.067   |
|                         |                    |          |         |         |            |        |         |

### Regressions Statistics for (B) Mainstream Media Info Sources Model

| Dependent Variable | Feature            | Estimate | Std.Err | z-value | $P(>  z )$ | Std.lv | Std.all |
|--------------------|--------------------|----------|---------|---------|------------|--------|---------|
| Vaccine Intention  | Info: Mainstream   | -0.106   | 0.189   | -0.562  | 0.574      | -0.101 | -0.101  |
|                    | Knowledge          | 0.046    | 0.034   | 1.337   | 0.181      | 0.045  | 0.045   |
|                    | COVID Concern      | 1.427    | 0.381   | 3.743   | 0.000      | 1.156  | 1.156   |
|                    | Rural              | 0.032    | 0.075   | 0.427   | 0.670      | 0.039  | 0.019   |
|                    | Over 65            | -0.130   | 0.111   | -1.169  | 0.242      | -0.159 | -0.075  |
|                    | Female ID          | -0.331   | 0.073   | -4.547  | 0.000      | -0.405 | -0.202  |
|                    | White              | 0.103    | 0.121   | 0.850   | 0.395      | 0.126  | 0.037   |
|                    | Liberal ID         | -0.353   | 0.144   | -2.454  | 0.014      | -0.432 | -0.197  |
|                    | Conservative ID    | 0.419    | 0.168   | 2.502   | 0.012      | 0.513  | 0.229   |
|                    | Libertarian ID     | 0.625    | 0.334   | 1.870   | 0.062      | 0.766  | 0.143   |
|                    | Non-Political ID   | 0.405    | 0.180   | 2.255   | 0.024      | 0.496  | 0.130   |
|                    | Other Political ID | -0.498   | 0.270   | -1.843  | 0.065      | -0.611 | -0.090  |

## S9 Model C: Mainstream and Liberal Media

### Model Fit Statistics: (C) Mainstream + Liberal Media Information Sources

|                                       |                   |
|---------------------------------------|-------------------|
| Number of model parameters            | 77                |
| Number of observations                | 904 (out of 1034) |
| chi squared                           | 548.135           |
| Degrees of freedom                    | 131               |
| P-value (Chi-square)                  | 0.000             |
| Akaike (AIC)                          | 17171.349         |
| Bayesian (BIC)                        | 17541.475         |
| Sample-size adjusted Bayesian (SABIC) | 17296.935         |

### Latent Variable Construction: (C) Mainstream + Liberal Media Information Sources

| Latent Variables                  | Survey Items | Estimate | Std.Err | z-value | $P(>  z )$ | Std.lv | Std.all |
|-----------------------------------|--------------|----------|---------|---------|------------|--------|---------|
| Knowledge                         | Q24-1        | 1.000    |         |         |            | 0.812  | 0.813   |
|                                   | Q24-2        | 0.898    | 0.049   | 18.406  | 0.000      | 0.729  | 0.730   |
|                                   | Q24-3        | 0.718    | 0.046   | 15.569  | 0.000      | 0.583  | 0.583   |
|                                   | Q24-4        | 0.718    | 0.046   | 15.585  | 0.000      | 0.584  | 0.584   |
| Peer Influence                    | Q14          | 1.000    |         |         |            | 0.753  | 0.754   |
|                                   | Q15          | 0.910    | 0.120   | 7.604   | 0.000      | 0.686  | 0.686   |
| COVID Concern                     | Q12          | 1.000    |         |         |            | 0.668  | 0.668   |
|                                   | Q13          | 0.848    | 0.058   | 14.690  | 0.000      | 0.566  | 0.567   |
| Info Source: Mainstream + Liberal | Q27-1        | 1.000    |         |         |            | 0.772  | 0.772   |
|                                   | Q27-3        | 0.700    | 0.051   | 13.791  | 0.000      | 0.540  | 0.540   |
|                                   | Q27-4        | 0.790    | 0.052   | 15.280  | 0.000      | 0.610  | 0.610   |
| Vaccine Intention                 | Q22          | 1.000    |         |         |            | 0.816  | 0.816   |
|                                   | Q23          | 1.112    | 0.052   | 21.346  | 0.000      | 0.907  | 0.907   |

### Path effects of key variables on Vaccine Intention (C-Mainstream+Liberal Media)

|                                   | Estimate | Std.Err | z-value | $P(>  z )$ | Std.lv | Std.all |
|-----------------------------------|----------|---------|---------|------------|--------|---------|
| Identify as Conservative          | -0.530   | 0.073   | -7.236  | 0.000      | -0.649 | -0.290  |
| Over 65                           | 0.276    | 0.058   | 4.755   | 0.000      | 0.339  | 0.161   |
| Female ID                         | -0.208   | 0.056   | -3.694  | 0.000      | -0.255 | -0.127  |
| Info Source: Mainstream + Liberal | 0.456    | 0.065   | 6.994   | 0.000      | 0.431  | 0.431   |

### Regressions Statistics for (C) Mainstream + Liberal Media Info Sources Model

| Dependent Variable                | Feature                    | Estimate | Std.Err | z-value | $P(>  z )$ | Std.lv | Std.all |
|-----------------------------------|----------------------------|----------|---------|---------|------------|--------|---------|
| Peer Influence                    | Rural                      | -0.194   | 0.060   | -3.226  | 0.001      | -0.258 | -0.127  |
|                                   | Over 65                    | -0.002   | 0.062   | -0.027  | 0.978      | -0.002 | -0.001  |
|                                   | Female ID                  | 0.060    | 0.059   | 1.019   | 0.308      | 0.080  | 0.040   |
|                                   | White                      | 0.030    | 0.100   | 0.304   | 0.761      | 0.040  | 0.012   |
|                                   | Liberal ID                 | -0.357   | 0.078   | -4.608  | 0.000      | -0.475 | -0.217  |
|                                   | Conservative ID            | -0.513   | 0.082   | -6.264  | 0.000      | -0.681 | -0.304  |
|                                   | Libertarian ID             | -0.305   | 0.163   | -1.867  | 0.062      | -0.405 | -0.076  |
|                                   | Non-Political ID           | 0.161    | 0.122   | 1.320   | 0.187      | 0.214  | 0.056   |
|                                   | Other Political ID         | -0.075   | 0.203   | -0.370  | 0.711      | -0.100 | -0.015  |
| Info Source: Mainstream + Liberal | Peer Inf                   | 0.004    | 0.043   | 0.086   | 0.931      | 0.004  | 0.004   |
|                                   | Rural                      | -0.095   | 0.053   | -1.808  | 0.071      | -0.124 | -0.061  |
|                                   | Over 65                    | 0.185    | 0.055   | 3.370   | 0.001      | 0.240  | 0.114   |
|                                   | Female ID                  | 0.147    | 0.052   | 2.813   | 0.005      | 0.190  | 0.095   |
|                                   | White                      | -0.050   | 0.088   | -0.567  | 0.571      | -0.064 | -0.019  |
|                                   | Liberal ID                 | 0.286    | 0.068   | 4.201   | 0.000      | 0.370  | 0.169   |
|                                   | Conservative ID            | -0.900   | 0.074   | -12.131 | 0.000      | -1.166 | -0.521  |
|                                   | Libertarian ID             | -0.729   | 0.144   | -5.061  | 0.000      | -0.944 | -0.177  |
|                                   | Non-Political ID           | -0.388   | 0.107   | -3.615  | 0.000      | -0.502 | -0.131  |
|                                   | Other Political ID         | -0.337   | 0.178   | -1.891  | 0.059      | -0.437 | -0.064  |
| Knowledge                         | Info:Mainstream + Liberal  | -0.109   | 0.066   | -1.666  | 0.096      | -0.104 | -0.104  |
|                                   | Rural                      | -0.079   | 0.061   | -1.288  | 0.198      | -0.097 | -0.048  |
|                                   | Over 65                    | 0.184    | 0.065   | 2.821   | 0.005      | 0.227  | 0.108   |
|                                   | Female ID                  | -0.134   | 0.062   | -2.175  | 0.030      | -0.165 | -0.082  |
|                                   | White                      | -0.034   | 0.103   | -0.336  | 0.737      | -0.042 | -0.013  |
|                                   | Liberal ID                 | 0.022    | 0.079   | 0.280   | 0.779      | 0.027  | 0.013   |
|                                   | Conservative ID            | 0.067    | 0.099   | 0.678   | 0.498      | 0.083  | 0.037   |
|                                   | Libertarian ID             | 0.064    | 0.174   | 0.367   | 0.713      | 0.078  | 0.015   |
|                                   | Non-Political ID           | 0.124    | 0.128   | 0.976   | 0.329      | 0.153  | 0.040   |
|                                   | Other Political ID         | 0.232    | 0.210   | 1.106   | 0.269      | 0.286  | 0.042   |
| COVID Concern                     | Info: Mainstream + Liberal | 0.396    | 0.058   | 6.798   | 0.000      | 0.457  | 0.457   |
|                                   | Rural                      | -0.064   | 0.049   | -1.302  | 0.193      | -0.096 | -0.047  |
|                                   | Over 65                    | 0.218    | 0.053   | 4.136   | 0.000      | 0.326  | 0.155   |
|                                   | Female ID                  | 0.047    | 0.050   | 0.952   | 0.341      | 0.071  | 0.035   |
|                                   | White                      | 0.115    | 0.082   | 1.394   | 0.163      | 0.172  | 0.051   |
|                                   | Liberal ID                 | 0.276    | 0.064   | 4.295   | 0.000      | 0.414  | 0.189   |
|                                   | Conservative ID            | -0.380   | 0.082   | -4.647  | 0.000      | -0.568 | -0.254  |
|                                   | Libertarian ID             | -0.784   | 0.141   | -5.548  | 0.000      | -1.173 | -0.220  |
|                                   | Non-Political ID           | -0.337   | 0.103   | -3.280  | 0.001      | -0.505 | -0.131  |
|                                   | Other Political ID         | 0.259    | 0.169   | 1.536   | 0.124      | 0.388  | 0.057   |



### Regressions Statistics for (C) Mainstream + Liberal Media Info Sources Model, Continued

| Dependent Variable | Feature                    | Estimate | Std.Err | z-value | $P(>  z )$ | Std.lv | Std.all |
|--------------------|----------------------------|----------|---------|---------|------------|--------|---------|
| Vaccine Intention  | Info: Mainstream + Liberal | -0.049   | 0.140   | -0.350  | 0.727      | -0.046 | -0.046  |
|                    | Knowledge                  | 0.047    | 0.034   | 1.371   | 0.170      | 0.047  | 0.047   |
|                    | COVID Concern              | 1.290    | 0.289   | 4.458   | 0.000      | 1.056  | 1.056   |
|                    | Rural                      | 0.020    | 0.069   | 0.289   | 0.772      | 0.024  | 0.012   |
|                    | Over 65                    | -0.098   | 0.093   | -1.053  | 0.293      | -0.120 | -0.057  |
|                    | Female ID                  | -0.329   | 0.069   | -4.773  | 0.000      | -0.403 | -0.201  |
|                    | White                      | 0.106    | 0.116   | 0.916   | 0.360      | 0.130  | 0.038   |
|                    | Liberal ID                 | -0.309   | 0.115   | -2.684  | 0.007      | -0.378 | -0.173  |
|                    | Conservative ID            | 0.368    | 0.147   | 2.504   | 0.012      | 0.451  | 0.202   |
|                    | Libertarian ID             | 0.530    | 0.286   | 1.852   | 0.064      | 0.650  | 0.122   |
|                    | Non-Political ID           | 0.368    | 0.166   | 2.211   | 0.027      | 0.451  | 0.117   |
|                    | Other Political ID         | -0.458   | 0.240   | -1.906  | 0.057      | -0.562 | -0.083  |

## S10 Model D: Mainstream and Conservative Media

### Model Fit Statistics: (D) Mainstream + Conservative Media Information Sources

|                                       |                   |
|---------------------------------------|-------------------|
| Number of model parameters            | 77                |
| Number of observations                | 908 (out of 1034) |
| chi squared                           | 617.802           |
| Degrees of freedom                    | 131               |
| P-value (Chi-square)                  | 0.000             |
| Akaike (AIC)                          | 17271.170         |
| Bayesian (BIC)                        | 17641.636         |
| Sample-size adjusted Bayesian (SABIC) | 17397.095         |

### Latent Variable Construction: (D) Mainstream + Conservative Media Information Sources

| Latent Variables                       | Survey Items | Estimate | Std.Err | z-value | $P(>  z )$ | Std.lv | Std.all |
|----------------------------------------|--------------|----------|---------|---------|------------|--------|---------|
| Knowledge                              | Q24-1        | 1.000    |         |         |            | 0.816  | 0.816   |
|                                        | Q24-2        | 0.903    | 0.048   | 18.657  | 0.000      | 0.737  | 0.737   |
|                                        | Q24-3        | 0.708    | 0.046   | 15.550  | 0.000      | 0.578  | 0.578   |
|                                        | Q24-4        | 0.709    | 0.046   | 15.567  | 0.000      | 0.578  | 0.579   |
| Peer Influence                         | Q14          | 1.000    |         |         |            | 0.725  | 0.725   |
|                                        | Q15          | 0.980    | 0.123   | 7.950   | 0.000      | 0.710  | 0.711   |
| COVID Concern                          | Q12          | 1.000    |         |         |            | 0.668  | 0.668   |
|                                        | Q13          | 0.832    | 0.056   | 14.893  | 0.000      | 0.554  | 0.555   |
| Info Source: Mainstream + Conservative | Q27-1        | 1.000    |         |         |            | 0.528  | 0.529   |
|                                        | Q27-2        | -1.024   | 0.073   | -14.068 | 0.000      | -0.541 | -0.541  |
|                                        | Q27-3        | 0.614    | 0.065   | 9.466   | 0.000      | 0.324  | 0.325   |
| Vaccine Intention                      | Q22          | 1.000    |         |         |            | 0.811  | 0.811   |
|                                        | Q23          | 1.129    | 0.053   | 21.412  | 0.000      | 0.915  | 0.916   |

We note that the contribution of conservative media to this information source latent variable has a negative sign.

### Path effects of key variables on Vaccine Intention (D-Mainstream+Conservative Media)

|                                        | Estimate | Std.Err | z-value | $P(>  z )$ | Std.lv | Std.all |
|----------------------------------------|----------|---------|---------|------------|--------|---------|
| Identify as Conservative               | -0.538   | 0.072   | -7.443  | 0.000      | -0.664 | -0.297  |
| Over 65                                | 0.279    | 0.057   | 4.874   | 0.000      | 0.344  | 0.163   |
| Female ID                              | -0.257   | 0.058   | -4.449  | 0.000      | -0.317 | -0.155  |
| Info Source: Mainstream + Conservative | 7.952    | 8.763   | 0.907   | 0.364      | 5.183  | 5.183   |

Although the coefficient of the information source is large in this model, the error is even larger, indicating that combining these responses on information source obscures the relationship between information source and vaccine intention.

### Regressions Statistics for (D) Mainstream + Conservative Media Info Sources Model

| Dependent Variable                     | Feature                         | Estimate | Std.Err | z-value | $P(>  z )$ | Std.lv | Std.all |
|----------------------------------------|---------------------------------|----------|---------|---------|------------|--------|---------|
| Peer Influence                         | Rural                           | -0.168   | 0.058   | -2.896  | 0.004      | -0.232 | -0.115  |
|                                        | Over 65                         | 0.015    | 0.060   | 0.255   | 0.799      | 0.021  | 0.010   |
|                                        | Female ID                       | 0.054    | 0.057   | 0.934   | 0.350      | 0.074  | 0.037   |
|                                        | White                           | 0.039    | 0.097   | 0.407   | 0.684      | 0.054  | 0.016   |
|                                        | Liberal ID                      | -0.320   | 0.075   | -4.258  | 0.000      | -0.442 | -0.202  |
|                                        | Conservative ID                 | -0.503   | 0.080   | -6.247  | 0.000      | -0.694 | -0.310  |
|                                        | Libertarian ID                  | -0.285   | 0.158   | -1.799  | 0.072      | -0.393 | -0.073  |
|                                        | Non-Political ID                | 0.185    | 0.117   | 1.579   | 0.114      | 0.256  | 0.067   |
|                                        | Other Political ID              | -0.042   | 0.197   | -0.212  | 0.832      | -0.058 | -0.008  |
| Info Source: Mainstream + Conservative | Peer Inf                        | 0.012    | 0.014   | 0.837   | 0.403      | 0.016  | 0.016   |
|                                        | Rural                           | -0.012   | 0.038   | -0.324  | 0.746      | -0.024 | -0.012  |
|                                        | Over 65                         | 0.062    | 0.040   | 1.523   | 0.128      | 0.116  | 0.055   |
|                                        | Female ID                       | 0.114    | 0.039   | 2.941   | 0.003      | 0.215  | 0.107   |
|                                        | White                           | 0.014    | 0.065   | 0.216   | 0.829      | 0.026  | 0.008   |
|                                        | Liberal ID                      | 0.243    | 0.050   | 4.874   | 0.000      | 0.460  | 0.210   |
|                                        | Conservative ID                 | -0.991   | 0.063   | -15.611 | 0.000      | -1.876 | -0.839  |
|                                        | Libertarian ID                  | -0.710   | 0.109   | -6.519  | 0.000      | -1.345 | -0.252  |
|                                        | Non-Political ID                | -0.357   | 0.080   | -4.482  | 0.000      | -0.657 | -0.176  |
|                                        | Other Political ID              | -0.295   | 0.132   | -2.226  | 0.026      | -0.558 | -0.082  |
| Knowledge                              | Info:Mainstream + Conservative  | -0.284   | 0.167   | -1.706  | 0.088      | -0.184 | -0.184  |
|                                        | Rural                           | -0.077   | 0.062   | -1.244  | 0.214      | -0.094 | -0.047  |
|                                        | Over 65                         | 0.177    | 0.066   | 2.683   | 0.007      | 0.217  | 0.103   |
|                                        | Female ID                       | -0.120   | 0.065   | -1.859  | 0.063      | -0.147 | -0.073  |
|                                        | White                           | -0.029   | 0.104   | -0.278  | 0.781      | -0.036 | -0.010  |
|                                        | Liberal ID                      | 0.059    | 0.088   | 0.668   | 0.504      | 0.072  | 0.033   |
|                                        | Conservative ID                 | -0.117   | 0.184   | -0.637  | 0.524      | -0.144 | -0.064  |
|                                        | Libertarian ID                  | -0.054   | 0.207   | -0.263  | 0.793      | -0.067 | -0.012  |
|                                        | Non-Political ID                | 0.061    | 0.139   | 0.436   | 0.663      | 0.074  | 0.019   |
|                                        | Other Political ID              | 0.183    | 0.218   | 0.839   | 0.401      | 0.224  | 0.033   |
| COVID Concern                          | Info: Mainstream + Conservative | 8.845    | 9.706   | 0.911   | 0.362      | 7.012  | 7.012   |
|                                        | Rural                           | 0.019    | 0.356   | 0.052   | 0.958      | 0.028  | 0.014   |
|                                        | Over 65                         | -0.245   | 0.690   | -0.355  | 0.722      | -0.368 | -0.175  |
|                                        | Female ID                       | -0.911   | 1.155   | -0.789  | 0.430      | -1.368 | -0.681  |
|                                        | White                           | -0.034   | 0.570   | -0.060  | 0.952      | -0.052 | -0.015  |
|                                        | Liberal ID                      | -1.730   | 2.357   | -0.734  | 0.463      | -2.597 | 1.186   |
|                                        | Conservative ID                 | 8.067    | 9.679   | 0.833   | 0.405      | 12.108 | 5.415   |
|                                        | Libertarian ID                  | 5.235    | 6.982   | 0.750   | 0.453      | 7.858  | 1.471   |
|                                        | Non-Political ID                | 2.650    | 3.503   | 0.757   | 0.449      | 3.978  | 1.040   |
|                                        | Other Political ID              | 2.734    | 3.075   | 0.889   | 0.374      | 4.103  | 0.602   |

**Regressions Statistics for (D) Mainstream + Conservative Media Info Sources Model, Continued**

| Dependent Variable | Feature                         | Estimate | Std.Err | z-value | $P(>  z )$ | Std.lv | Std.all |
|--------------------|---------------------------------|----------|---------|---------|------------|--------|---------|
| Vaccine Intention  | Info: Mainstream + Conservative | 0.630    | 0.269   | 2.343   | 0.019      | 0.411  | 0.411   |
|                    | Knowledge                       | 0.057    | 0.038   | 1.504   | 0.133      | 0.057  | 0.057   |
|                    | COVID Concern                   | 0.830    | 0.155   | 5.348   | 0.000      | 0.682  | 0.682   |
|                    | Rural                           | -0.010   | 0.060   | -0.171  | 0.864      | 0.013  | 0.006   |
|                    | Over 65                         | -0.019   | 0.072   | -0.256  | 0.798      | -0.023 | -0.011  |
|                    | Female ID                       | -0.355   | 0.064   | -5.523  | 0.000      | -0.437 | -0.218  |
|                    | White                           | 0.142    | 0.099   | 1.432   | 0.152      | 0.175  | 0.051   |
|                    | Liberal ID                      | -0.297   | 0.091   | -3.244  | 0.001      | -0.366 | -0.167  |
|                    | Conservative ID                 | 0.703    | 0.229   | 3.073   | 0.002      | 0.867  | 0.388   |
|                    | Libertarian ID                  | 0.530    | 0.223   | 2.376   | 0.017      | 0.654  | 0.122   |
|                    | Non-Political ID                | 0.386    | 0.141   | 2.741   | 0.006      | 0.476  | 0.125   |
|                    | Other Political ID              | -0.193   | 0.220   | -0.876  | 0.381      | -0.238 | -0.035  |

## S11 Model E: All Media

### Model Fit Statistics: (E) All Information Sources

|                                       |                   |
|---------------------------------------|-------------------|
| Number of model parameters            | 85                |
| Number of observations                | 889 (out of 1034) |
| chi squared                           | 1210.778          |
| Degrees of freedom                    | 221               |
| P-value (Chi-square)                  | 0.000             |
| Akaike (AIC)                          | 26822.817         |
| Bayesian (BIC)                        | 27229.976         |
| Sample-size adjusted Bayesian (SABIC) | 26960.032         |

### Latent Variable Construction: (E) All Information Sources

| Latent Variables         | Survey Items | Estimate | Std.Err | z-value | $P(>  z )$ | Std.lv | Std.all |
|--------------------------|--------------|----------|---------|---------|------------|--------|---------|
| Knowledge                | Q24-1        | 1.000    |         |         |            | 0.817  | 0.817   |
|                          | Q24-2        | 0.898    | 0.049   | 18.389  | 0.000      | 0.733  | 0.734   |
|                          | Q24-3        | 0.707    | 0.046   | 15.367  | 0.000      | 0.578  | 0.578   |
|                          | Q24-4        | 0.709    | 0.046   | 15.410  | 0.000      | 0.579  | 0.580   |
| Peer Influence           | Q14          | 1.000    |         |         |            | 0.741  | 0.742   |
|                          | Q15          | 0.938    | 0.123   | 7.598   | 0.000      | 0.695  | 0.696   |
| COVID Concern            | Q12          | 1.000    |         |         |            | 0.666  | 0.667   |
|                          | Q13          | 0.850    | 0.058   | 14.683  | 0.000      | 0.567  | 0.567   |
| Info Source: All Sources | Q27-1        | 1.000    |         |         |            | 0.727  | 0.727   |
|                          | Q27-2        | -0.580   | 0.053   | -11.037 | 0.000      | -0.422 | -0.422  |
|                          | Q27-3        | 0.687    | 0.053   | 12.956  | 0.000      | 0.499  | 0.500   |
|                          | Q27-4        | 0.795    | 0.054   | 14.821  | 0.000      | 0.578  | 0.578   |
|                          | Q27-5        | 0.360    | 0.052   | 6.923   | 0.000      | 0.261  | 0.262   |
|                          | Q27-6        | 0.074    | 0.052   | 1.453   | 0.151      | 0.054  | 0.054   |
|                          | Q27-7        | 0.166    | 0.052   | 3.210   | 0.001      | 0.121  | 0.121   |
| Vaccine Intention        | Q22          | 1.000    |         |         |            | 0.817  | 0.817   |
|                          | Q23          | 1.119    | 0.052   | 21.430  | 0.000      | 0.914  | 0.914   |

### Path effects of key variables on Vaccine Intention (E-All Info)

|                          | Estimate | Std.Err | z-value | $P(>  z )$ | Std.lv | Std.all |
|--------------------------|----------|---------|---------|------------|--------|---------|
| Identify as Conservative | -0.530   | 0.074   | -7.199  | 0.000      | -0.649 | -0.290  |
| Over 65                  | 0.265    | 0.059   | 4.513   | 0.000      | 0.324  | 0.153   |
| Female ID                | -0.226   | 0.058   | -3.881  | 0.000      | -0.276 | -0.137  |
| Info Source: All Sources | 0.591    | 0.085   | 6.921   | 0.000      | 0.526  | 0.526   |

### Regressions Statistics for (E) All Info Sources Model

| Dependent Variable       | Feature            | Estimate | Std.Err | z-value | $P(>  z )$ | Std.lv | Std.all |
|--------------------------|--------------------|----------|---------|---------|------------|--------|---------|
| Peer Influence           | Rural              | -0.187   | 0.060   | -3.109  | 0.002      | -0.252 | -0.124  |
|                          | Over 65            | 0.015    | 0.062   | 0.243   | 0.808      | 0.020  | 0.010   |
|                          | Female ID          | 0.060    | 0.059   | 1.023   | 0.306      | 0.082  | 0.041   |
|                          | White              | 0.039    | 0.099   | 0.395   | 0.693      | 0.053  | 0.016   |
|                          | Liberal ID         | -0.347   | 0.078   | -4.480  | 0.000      | -0.469 | -0.214  |
|                          | Conservative ID    | -0.515   | 0.082   | -6.252  | 0.000      | -0.695 | -0.311  |
|                          | Libertarian ID     | -0.301   | 0.161   | -1.865  | 0.062      | -0.406 | -0.077  |
|                          | Non-Political ID   | 0.161    | 0.122   | 1.318   | 0.188      | 0.217  | 0.056   |
|                          | Other Political ID | -0.065   | 0.201   | -0.326  | 0.744      | -0.088 | -0.013  |
| Info Source: All Sources | Peer Inf           | 0.023    | 0.039   | 0.586   | 0.558      | 0.023  | 0.023   |
|                          | Rural              | -0.080   | 0.048   | -1.652  | 0.099      | -0.110 | -0.054  |
|                          | Over 65            | 0.117    | 0.050   | 2.332   | 0.020      | 0.162  | 0.076   |
|                          | Female ID          | 0.110    | 0.048   | 2.303   | 0.021      | 0.151  | 0.075   |
|                          | White              | -0.076   | 0.080   | -0.957  | 0.339      | -0.105 | -0.031  |
|                          | Liberal ID         | 0.327    | 0.062   | 5.240   | 0.000      | 0.450  | 0.206   |
|                          | Conservative ID    | -0.965   | 0.070   | -13.766 | 0.000      | -1.327 | -0.594  |
|                          | Libertarian ID     | -0.707   | 0.131   | -5.398  | 0.000      | -0.973 | -0.184  |
|                          | Non-Political ID   | -0.357   | 0.099   | -3.621  | 0.000      | -0.491 | -0.127  |
|                          | Other Political ID | -0.323   | 0.162   | -1.996  | 0.046      | -0.444 | -0.066  |
| Knowledge                | Info: All Sources  | -0.095   | 0.082   | -1.156  | 0.247      | -0.085 | -0.085  |
|                          | Rural              | -0.076   | 0.062   | -1.217  | 0.224      | -0.093 | -0.046  |
|                          | Over 65            | 0.183    | 0.066   | 2.773   | 0.006      | 0.224  | 0.106   |
|                          | Female ID          | -0.132   | 0.062   | -2.118  | 0.034      | -0.162 | -0.081  |
|                          | White              | -0.044   | 0.104   | -0.422  | 0.673      | -0.054 | -0.016  |
|                          | Liberal ID         | 0.017    | 0.083   | 0.206   | 0.837      | 0.021  | 0.010   |
|                          | Conservative ID    | 0.081    | 0.114   | 0.715   | 0.474      | 0.100  | 0.045   |
|                          | Libertarian ID     | 0.081    | 0.178   | 0.456   | 0.649      | 0.099  | 0.019   |
|                          | Non-Political ID   | 0.154    | 0.131   | 1.178   | 0.239      | 0.188  | 0.049   |
|                          | Other Political ID | 0.235    | 0.211   | 1.113   | 0.266      | 0.288  | 0.043   |
| COVID Concern            | Info: All Sources  | 0.556    | 0.077   | 7.914   | 0.000      | 0.607  | 0.607   |
|                          | Rural              | -0.052   | 0.050   | -1.040  | 0.298      | -0.078 | -0.039  |
|                          | Over 65            | 0.219    | 0.054   | 4.080   | 0.000      | 0.328  | 0.155   |
|                          | Female ID          | 0.040    | 0.050   | 0.786   | 0.432      | 0.059  | 0.030   |
|                          | White              | 0.133    | 0.084   | 1.590   | 0.112      | 0.200  | 0.059   |
|                          | Liberal ID         | 0.205    | 0.068   | 3.028   | 0.002      | 0.307  | 0.140   |
|                          | Conservative ID    | -0.204   | 0.097   | -2.108  | 0.035      | -0.306 | -0.137  |
|                          | Libertarian ID     | -0.671   | 0.146   | -4.598  | 0.000      | -1.008 | -0.190  |
|                          | Non-Political ID   | -0.314   | 0.106   | -2.954  | 0.003      | -0.471 | -0.122  |
|                          | Other Political ID | 0.302    | 0.171   | 1.765   | 0.078      | 0.453  | 0.067   |

### Regressions Statistics for (E) All Info Sources Model, Continued

| Dependent Variable | Feature            | Estimate | Std.Err | z-value | $P(>  z )$ | Std.lv | Std.all |
|--------------------|--------------------|----------|---------|---------|------------|--------|---------|
| Vaccine Intention  | Info: All Sources  | -0.188   | 0.252   | -0.744  | 0.457      | -0.167 | -0.167  |
|                    | Knowledge          | 0.043    | 0.034   | 1.258   | 0.208      | 0.043  | 0.043   |
|                    | COVID Concern      | 1.408    | 0.392   | 3.597   | 0.000      | 1.149  | 1.149   |
|                    | Rural              | 0.016    | 0.073   | 0.223   | 0.823      | 0.020  | 0.010   |
|                    | Over 65            | -0.121   | 0.112   | -1.082  | 0.279      | -0.148 | -0.070  |
|                    | Female ID          | -0.331   | 0.073   | -4.519  | 0.000      | -0.405 | -0.202  |
|                    | White              | 0.098    | 0.130   | 0.754   | 0.451      | 0.120  | 0.035   |
|                    | Liberal ID         | -0.301   | 0.120   | -2.518  | 0.012      | -0.369 | -0.169  |
|                    | Conservative ID    | 0.332    | 0.145   | 2.293   | 0.022      | 0.406  | 0.182   |
|                    | Libertarian ID     | 0.556    | 0.319   | 1.744   | 0.081      | 0.681  | 0.129   |
|                    | Non-Political ID   | 0.393    | 0.188   | 2.088   | 0.037      | 0.481  | 0.124   |
|                    | Other Political ID | -0.505   | 0.271   | -1.863  | 0.062      | -0.618 | -0.092  |
